*Travel Medicine and Infectious Diseases*

1 **A decade of dengue disease burden in Africa (2013–2023): a systematic review**

2

3 Gaspary O. Mwanyika<sup>a,b</sup>, Monika Moir<sup>a</sup>, Abdualmoniem O. Musa<sup>c</sup>, Jenicca

4 Poongavanan<sup>a</sup>, Graeme Dor<sup>a</sup>, Eduan Wilkinson<sup>a</sup>, Cheryl Baxter<sup>a</sup>, Tulio de Oliveira<sup>a,d</sup>

5 and Houriayah Tegally<sup>a</sup>

6

7 <sup>a</sup>Centre for Epidemic Response and Innovation (CERI), School for Data Science and  
8 Computational Thinking, Stellenbosch University, Stellenbosch, South Africa

9 <sup>b</sup>Department of Applied Sciences, Mbeya University of Science and Technology,  
10 Mbeya, Tanzania

11 <sup>c</sup>Kassala University & Ministry of Health, Kassala State, Sudan

12 <sup>d</sup>KwaZulu-Natal Research Innovation and Sequencing Platform, University of  
13 KwaZulu- Natal, Durban, South Africa

14

15

16

17

18

19 **Corresponding authors:** Houriiyah Tegally ([houriiyah@sun.ac.za](mailto:houriiyah@sun.ac.za))

20

21

22

23

24

25

## *Travel Medicine and Infectious Diseases*

### 26 **Abstract**

### 27 **Background**

28 Dengue is a major mosquito-borne disease worldwide. The epidemiological trends of the  
29 disease in Africa over the past decade remain unclear. This review aims to provide insight  
30 into the epidemiological trends of dengue in Africa from 2013–2023.

### 31 **Methods**

32 We systematically searched PubMed/MEDLINE and Scopus for studies published  
33 between January 2013 and December 2023. Additionally, we collected official  
34 records from the World Health Organization for Africa and African Centre for Disease  
35 Control. We included studies that reported dengue cases in humans in Africa and  
36 excluded publications prior to 2013, review articles and non-human studies. For  
37 specific countries, the suspected cases per 100,000 population and fatality rates  
38 were estimated and the trend predicted using a negative binomial model. The  
39 statistical analyses and visualisations were performed using R programming.

### 40 **Results**

41 Of the 453 reports screened, 87 from 25 African countries were selected for  
42 systematic review. Between 2013 and 2023, approximately 200,000 suspected  
43 dengue cases, 90,000 confirmed cases and 900 deaths were reported in Africa.

44 Over 80% of confirmed cases originated from West Africa, with Burkina Faso  
45 reporting over 500 cases per 100,000 population. DENV1 and DENV2 predominating  
46 at different times with transmission closely linked to rainy seasons.

### 47 **Conclusions**

48 The rising dengue cases across Africa, highlight the need to strengthen surveillance  
49 and implement effective regional-specific interventions against future dengue

## *Travel Medicine and Infectious Diseases*

50 outbreaks. Further research is necessary to improve our understanding on dengue  
51 transmission dynamics and suitability of regions in Africa.

52 **Key words:** dengue, disease burden, Africa, systematic review

53

### 54 **1. Introduction**

55 Dengue is a major mosquito-borne viral disease transmitted by infected female  
56 mosquitoes of the *Aedes* genus [1]. The disease is caused by dengue virus (DENV)  
57 of the Flaviviridae family in the genus *Orthoflavivirus*. The virus consists of four  
58 antigenically distinct serotypes: DENV1, DENV2, DENV3 and DENV4, which are  
59 capable of inducing mild to severe illnesses in humans [2]. Globally, approximately  
60 390 million dengue infections, 500,000 hospitalizations and more than 20,000 deaths  
61 are reported annually [3]. In recent decades, the virus has transcended its traditional  
62 boundaries, extending into temperate regions including Europe and North America  
63 [4,5]. The disease has been reported in Africa since the late 19<sup>th</sup> and early 20<sup>th</sup>  
64 centuries, with reported cases in Zanzibar (1870), Burkina Faso (1925), Egypt  
65 (1887), South Africa (1926–1927), and Senegal (1927–1928). From the 1960s to  
66 2010, laboratory confirmed cases were reported in 15 African countries, with recent  
67 endemicity established in more than 34 countries [6]. Although the prevalence of  
68 dengue virus across Africa has been previously documented [7,8], epidemiological  
69 trends in the context of morbidity and mortality, geographical distribution, seasonality  
70 and transmission suitability remain unclear. In this systematic review, we collate a  
71 decade of dengue epidemiological data from the African continent to synthesise and  
72 analyse epidemiological trends between 2013 and 2023. We highlight regional and  
73 country-specific epidemiological trends to inform public health response against  
74 future dengue outbreaks in Africa.

## *Travel Medicine and Infectious Diseases*

### 75 **2. Methods**

#### 76 **2.1 Search strategy and selection criteria**

77 This review analysed studies and reports describing dengue cases in African  
78 countries and territories. Medical Subject Headings (MeSH) terms such as: dengue  
79 virus, prevalence, epidemiology, serotype, in conjunction with a compilation of  
80 specific African countries and territories were used in the search. We searched  
81 PubMed/MEDLINE and Scopus databases for relevant English articles using an  
82 advanced search strategy (Appendix S1). Additional epidemiological reports were  
83 obtained from the World Health Organization for Africa (WHO AFRO) and the African  
84 Centre for Disease Control (AFRICA CDC) between January 2013 and December  
85 2023. We included articles that reported dengue cases in human studies in Africa  
86 and official records from the WHO AFRO and AFRICA CDC surveillance reports. We  
87 excluded publications prior to 2013, review articles, and non-human studies.

#### 88 **2.2 Screening and quality assessment**

89 Two reviewers (GOM and AM) conducted an initial screening of the titles and  
90 abstracts from the search results using Rayyan application software accessible at  
91 <https://rayyan.ai/> to identify relevant articles. Reasons for exclusion of irrelevant  
92 articles were documented. Three reviewers (GOM, AM and HT) evaluated the quality  
93 of included reports. The selection of reports for inclusion in the systematic review  
94 followed the Preferred Reporting Items for Systematic Reviews and Meta-analysis  
95 guidelines (PRISMA) [9].

96

#### 97 **2.3 Key definitions**

## *Travel Medicine and Infectious Diseases*

98 The following terms have been used in the analysis to signify different metrics used  
99 to describe dengue burden in Africa.

- 100 1. A suspected case was defined as any individual residing in or having travelled  
101 to areas with dengue transmission within the past 14 days and presents with  
102 acute fever, typically lasting from two to seven days' duration with two or more  
103 of the following symptoms: nausea/vomiting, abdominal pain, chills, rash,  
104 headache/retro-orbital pain, myalgia and arthralgia; may exhibit petechial or  
105 positive tourniquet test (+ >10 pinpoint-sized spots of bleeding under the skin  
106 (petechiae) per square inch, low platelet and white blood cell counts even  
107 without any warning sign.
- 108 2. A confirmed case was defined as a suspected dengue case with laboratory  
109 confirmation of infection which may include polymerase chain reaction (PCR),  
110 virus culture, IgM seroconversion in paired sera (acute and convalescent  
111 samples), IgG seroconversion in paired sera or fourfold IgG titre in paired  
112 sera.
- 113 3. A severe case was defined as a suspected/probable/confirmed dengue case  
114 presenting with one or more of the following symptoms: severe plasma  
115 leakage leading to dengue shock syndrome fluid accumulation with  
116 respiratory distress, severe bleeding, severe damage of organs such as liver  
117 (aspartate aminotransferase (ASAT) or alanine aminotransferase (ALT)  
118 elevation  $\geq 1000$ ) and central nervous system.
- 119 4. Case fatality rate was defined as the proportion of deaths within a specified  
120 population that are attributable to the total number of suspected dengue cases  
121 over a specific period.

## *Travel Medicine and Infectious Diseases*

122 5. Transmission potential (index P) was defined as a measure that quantifies the  
123 risk of dengue virus transmission in a specific region, taking into account  
124 climate-based factors such as temperature and humidity, which directly  
125 influence the breeding, survival, and biting behaviour of the mosquito vectors  
126 responsible for spreading the virus. This index provides insight into how  
127 favourable environmental conditions are for dengue circulation in a given  
128 area. The index was developed by Nakase et. al (2023) [10]. The spatio-  
129 temporal estimates of transmission potential were then compiled for African  
130 countries and territories. A threshold of 1.0 was selected to compare with the  
131 basic reproductive rate. A value of 1.0 indicates that in a population where the  
132 average number of adult female mosquitoes per host is 1.0 corresponds to a  
133 reproduction number of 1. The period of transmission suitability is defined as  
134 a month in which the transmission potential is greater than 1.0 [10].

### 135 **2.4 Data synthesis and analysis**

136 Data on the year of outbreak, country of origin, number of suspected and confirmed  
137 cases, deaths and serotype counts were extracted from included reports and  
138 compiled into an Excel spreadsheet (Microsoft Corp., 2016 Redmond, WA, USA).  
139 The estimation of dengue burden was based on the number of suspected cases per  
140 country's population during the respective years. The population data for the  
141 respective years were obtained from the Worldometer web-source, accessible at  
142 <https://www.worldometers.info/population/africa/>. Case fatality rate (CFR) was  
143 computed based on the number of reported deaths per total number of suspected  
144 dengue cases in the specific country. A negative binomial model was used to predict  
145 the growth of suspected cases using the year as a predictor variable. The model was

## *Travel Medicine and Infectious Diseases*

146 selected to suit count data, such as dengue case numbers and accounts for  
147 overdispersion. The model was presented by the following equation;

$$148 \quad \log(y) = \beta_0 + \beta_1 \cdot Year_t$$

149 Where;

150  $y$  = Expected number of suspected dengue cases

151  $\beta_0$  = Intercept of the model

152  $\beta_1$  = Coefficient for the year  $t$

153  $Year_t$  = The year variable for which the number of dengue cases was predicted

154  $e^{\beta_0 + \beta_1}$  = A multiplicative factor for the growth in dengue cases. The best fit was  
155 compared with a Poisson regression model using likelihood ratio test. Statistical  
156 analysis and visualizations were conducted using R version 4.3.2 with primary  
157 packages ggplot2, dplyr and MASS.

158

### 159 **3. Results**

#### 160 **3.1 Literature search**

161 The review protocol was registered in the PROSPERO International prospective  
162 register for systematic reviews of human studies under CRD42023480486. The  
163 search yielded a total of 453 results, including 297 from academic databases and  
164 156 official sources. After removing 151 duplicates, 302 unique records were  
165 screened by titles and abstracts. 173 reports were excluded from the screening  
166 process, and 129 were evaluation for eligibility. Finally, 42 records were excluded for  
167 specific reasons (Appendix S2), and 87 included in the systematic review (**Figure 1**).

168

## Travel Medicine and Infectious Diseases

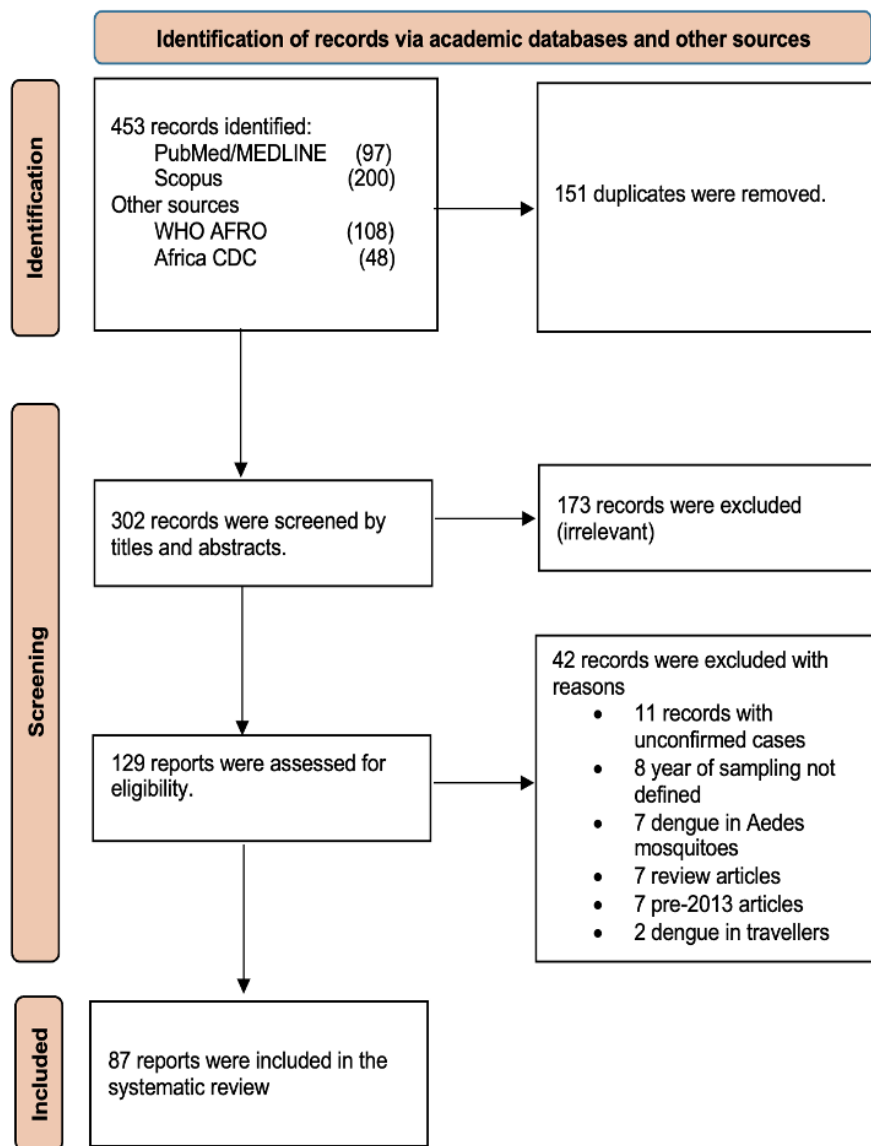

169

170 Figure 1. Selection process of included reports according to PRISMA guideline.

171

### 172 3.2 An overview of included reports

173 Table 1 presents the epidemiological data extracted from the included reports,

174 comprising 35 published articles and 52 official records from the WHO AFRO and

175 AFRICA CDC surveillance data. Between January 2013 and December 2023, data

176 on dengue were available from 25 African countries. Seven countries, including,



## *Travel Medicine and Infectious Diseases*

177 Burkina Faso (7 records, n = 14,7286 ), Cameroon (6, n = 2513), Cote d'Ivoire (5, n =  
178 8,250), Kenya (8, n = 7,828), Senegal (8, n = 4,606), Sudan (7, n = 2,696) and  
179 Tanzania (6, n = 10,369) accounted for more than 50% of all records (46/87) and  
180 80% of cumulative suspected cases (19,7707/24,4352). A comparison year-on-year  
181 reveals that the highest number of reports (21.8%, 19/87) and suspected cases  
182 (60.3%, 174,888/245,143) were documented in 2023. In this year, Burkina Faso  
183 reported the most lethal outbreak with a total of 147,286/174,888 (84.2%) cumulative  
184 suspected cases, 68,402/72677 (94.1%) confirmed cases, and 688/765 (89.9%) .

**Table 1.** Epidemiological trends of dengue cases and deaths in Africa over the last decade (2013–2023, n= 87)

| Reference | Country                      | Population | Year of outbreak | Suspected cases | Confirmed cases | Deaths | Serotype |       |       |       |
|-----------|------------------------------|------------|------------------|-----------------|-----------------|--------|----------|-------|-------|-------|
|           |                              |            |                  |                 |                 |        | DENV1    | DENV2 | DENV3 | DENV4 |
| [11]      | Tanzania                     | 49253643   | 2013             | 431             | 431             | 2      | 0        | 431   | 0     | 0     |
| [12]      | Kenya                        | 44790000   | 2013             | 267             | 101             | 1      | 51       | 48    | 0     | 0     |
| [13]      | Tanzania                     | 50814552   | 2014             | 2121            | 1017            | 4      | 0        | 0     | 0     | 0     |
| [14]      | South Sudan                  | 37003245   | 2014             | 155             | 35              | 8      | 35       | 0     | 0     | 0     |
| [15]      | Tanzania                     | 50814552   | 2014             | 483             | 101             | 0      | 0        | 101   | 0     | 0     |
| [16]      | Kenya                        | 45831863   | 2014             | 1022            | 361             | 0      | 36       | 105   | 10    | 11    |
| [17]      | Nigeria                      | 179E+08    | 2014             | 526             | 24              | 0      | 0        | 0     | 0     | 0     |
| [18]      | Kenya                        | 45831863   | 2014             | 489             | 43              | 0      | 0        | 0     | 0     | 0     |
| [19]      | Burkina Faso                 | 18106000   | 2015             | 399             | 21              | 0      | 0        | 0     | 0     | 0     |
| [20]      | Cameroon                     | 23012646   | 2015             | 349             | 21              | 0      | 0        | 0     | 0     | 0     |
| [21]      | Egypt                        | 97720000   | 2015             | 253             | 28              | 0      | 28       | 0     | 0     | 0     |
| [22]      | Senegal                      | 14360000   | 2015             | 104             | 3               | 0      | 3        | 0     | 0     | 0     |
| [23]      | Burkina Faso                 | 19280000   | 2016             | 1327            | 19              | 0      | 0        | 11    | 6     | 0     |
| [24]      | Democratic Republic of Congo | 81430000   | 2016             | 253             | 14              | 0      | 12       | 2     | 0     | 0     |
| [25]      | Sudan                        | 39380000   | 2016             | 106             | 4               | 0      | 0        | 4     | 0     | 0     |
| [26]      | Seychelles                   | 94677      | 2016             | 1062            | 422             | 0      | 0        | 0     | 0     | 0     |
| [27]      | Burkina Faso                 | 19280000   | 2016             | 2929            | 317             | 0      | 6        | 191   | 104   | 0     |
| [28]      | Kenya                        | 47894670   | 2016             | 560             | 5               | 0      | 0        | 4     | 0     | 0     |
|           | Burkina Faso                 | 19280000   | 2016             | 1266            | 29              | 15     | 0        | 29    | 0     | 0     |
| [29]      | Angola                       | 21000000   | 2017             | 401             | 66              | 0      | 1        | 62    | 0     | 0     |
| [30]      | Burkina Faso                 | 19280000   | 2017             | 9029            | 141             | 18     | 2        | 58    | 12    | 0     |
| [31]      | Côte d'Ivoire                | 24213622   | 2017             | 1421            | 322             | 2      | 13       | 181   | 78    | 0     |
| [32]      | Egypt                        | 101800000  | 2017             | 144             | 97              | 0      | 0        | 97    | 0     | 0     |
| [33]      | Kenya                        | 48950000   | 2017             | 1537            | 806             | 1      | 0        | 0     | 0     | 0     |
| [34]      | Sudan                        | 40680000   | 2017             | 90              | 90              | 2      | 0        | 0     | 0     | 0     |
| [35]      | Cameroon                     | 24390000   | 2017             | 114             | 8               | 0      | 5        | 0     | 0     | 0     |
| [36]      | Ethiopia                     | 108E+08    | 2017             | 101             | 101             | 1      | 0        | 15    | 0     | 0     |
| [37]      | Cameroon                     | 24390000   | 2017             | 791             | 86              | 0      | 5        | 16    | 8     | 0     |
| [38]      | Mali                         | 19310000   | 2017             | 429             | 33              | 0      | 0        | 0     | 0     | 0     |
| [39]      | Cameroon                     | 24390000   | 2017             | 629             | 2               | 0      | 2        | 0     | 0     | 0     |
| [40]      | Mauritania                   | 4160000    | 2017             | 307             | 165             | 0      | 0        | 104   | 0     | 0     |
| [41]      | Seychelles                   | 95843      | 2017             | 4068            | 1429            | 0      | 0        | 0     | 0     | 0     |

| Reference | Country               | Population | Year of outbreak | Suspected cases | Confirmed cases | Deaths | Serotype |       |       |       |
|-----------|-----------------------|------------|------------------|-----------------|-----------------|--------|----------|-------|-------|-------|
|           |                       |            |                  |                 |                 |        | DENV1    | DENV2 | DENV3 | DENV4 |
| [42]      | Senegal               | 15570000   | 2018             | 2981            | 342             | 0      | 0        | 0     | 0     | 0     |
| [43]      | Mauritania            | 42710000   | 2018             | 322             | 28              | 0      | 0        | 28    | 0     | 0     |
| [44]      | Tanzania              | 58090000   | 2018             | 226             | 37              | 0      | 0        | 27    | 0     | 0     |
| [45]      | Ghana                 | 30637585   | 2018             | 150             | 4               | 0      | 1        | 0     | 3     | 0     |
| [46]      | Nigeria               | 198E+08    | 2018             | 130             | 11              | 0      | 5        | 0     | 6     | 0     |
| [47]      | Reunion               | 856942     | 2018             | 6770            | 951             | 6      | 0        | 951   | 0     | 0     |
| [48]      | Senegal               | 15570000   | 2018             | 198             | 17              | 0      | 0        | 4     | 11    | 0     |
| [49]      | Senegal               | 15570000   | 2018             | 832             | 224             | 0      | 6        | 35    | 103   | 0     |
| [50]      | Seychelles            | 96762      | 2018             | 6120            | 1511            | 0      | 0        | 0     | 0     | 0     |
| [51]      | Kenya                 | 48950000   | 2019             | 660             | 286             | 0      | 0        | 0     | 0     | 0     |
| [52]      | Benin                 | 12290444   | 2019             | 26              | 14              | 2      | 0        | 0     | 0     | 0     |
| [53]      | Côte d'Ivoire         | 26150000   | 2019             | 2919            | 302             | 2      | 95       | 28    | 0     | 0     |
| [54]      | Tanzania              | 59870000   | 2019             | 6917            | 5286            | 13     | 0        | 0     | 0     | 0     |
| [52]      | Ethiopia              | 114E+08    | 2019             | 1251            | 6               | 0      | 0        | 0     | 0     | 0     |
| [52]      | Mali                  | 20570000   | 2019             | 20              | 9               | 0      | 0        | 0     | 0     | 0     |
| [55]      | Senegal               | 16000000   | 2019             | 6               | 1               | 0      | 0        | 0     | 0     | 0     |
| [56]      | Sudan                 | 43230000   | 2019             | 265             | 145             | 0      | 35       | 10    | 10    | 0     |
| [57]      | Sudan                 | 43230000   | 2019             | 100             | 23              | 0      | 0        | 0     | 23    | 0     |
| [58]      | Reunion               | 861200     | 2019             | 30              | 16              | 0      | 16       | 0     | 0     | 0     |
| [59]      | Sudan                 | 43230000   | 2019             | 76              | 17              | 2      | 0        | 0     | 0     | 0     |
| [60]      | Tanzania              | 59870000   | 2019             | 191             | 20              | 0      | 20       | 0     | 0     | 0     |
| [61]      | Mauritius             | 1296279    | 2019             | 265             | 141             | 0      | 136      | 5     | 0     | 0     |
| [62]      | Cameroon              | 25780000   | 2019             | 310             | 14              | 0      | 0        | 0     | 0     | 0     |
| [63]      | Sudan                 | 43230000   | 2019             | 395             | 67              | 0      | 0        | 0     | 0     | 0     |
| [64]      | Comoros               | 806166     | 2020             | 696             | 4               | 0      | 4        | 0     | 0     | 0     |
| [65]      | Mauritania            | 4615000    | 2020             | 7               | 2               | 0      | 0        | 0     | 0     | 0     |
| [66]      | Cameroon              | 27200000   | 2020             | 320             | 41              | 0      | 2        | 8     | 28    | 0     |
| [67]      | Nigeria               | 213996181  | 2020             | 82              | 11              | 0      | 11       | 0     | 0     | 0     |
| [68]      | Senegal               | 17763163   | 2021             | 86              | 27              | 0      | 0        | 0     | 0     | 0     |
| [69]      | Kenya                 | 53542175   | 2021             | 867             | 36              | 2      | 0        | 0     | 0     | 0     |
| [70]      | Angola                | 34500000   | 2021             | 86              | 38              | 0      | 0        | 0     | 0     | 0     |
| [71]      | Côte d'Ivoire         | 27480000   | 2021             | 4               | 4               | 0      | 0        | 0     | 0     | 0     |
| [72]      | Côte d'Ivoire         | 28200000   | 2022             | 11              | 11              | 1      | 0        | 0     | 0     | 0     |
| [73]      | Kenya                 | 54027487   | 2022             | 2426            | 68              | 2      | 0        | 0     | 0     | 0     |
| [74]      | Sao Tome and Principe | 227380     | 2022             | 1150            | 1150            | 8      | 0        | 0     | 0     | 0     |

| Reference | Country               | Population | Year of outbreak | Suspected cases | Confirmed cases | Deaths | Serotype |       |       |       |
|-----------|-----------------------|------------|------------------|-----------------|-----------------|--------|----------|-------|-------|-------|
|           |                       |            |                  |                 |                 |        | DENV1    | DENV2 | DENV3 | DENV4 |
| [75]      | Niger                 | 26207977   | 2022             | 1               | 1               | 0      | 0        | 0     | 0     | 0     |
| [74]      | Senegal               | 17763163   | 2022             | 196             | 169             | 0      | 0        | 0     | 0     | 0     |
| [76]      | Chad                  | 18278568   | 2023             | 1581            | 41              | 1      | 0        | 0     | 0     | 0     |
| [77]      | Côte d'Ivoire         | 28873034   | 2023             | 3895            | 321             | 27     | 0        | 0     | 0     | 0     |
| [78]      | Burkina Faso          | 23251485   | 2023             | 146878          | 68346           | 688    | 0        | 0     | 0     | 0     |
| [78]      | Senegal               | 17763163   | 2023             | 203             | 203             | 0      | 0        | 0     | 0     | 0     |
| [78]      | Mali                  | 23293698   | 2023             | 4427            | 629             | 29     | 0        | 0     | 0     | 0     |
| [78]      | Cape Verde            | 573007     | 2023             | 410             | 193             | 0      | 0        | 0     | 0     | 0     |
| [76]      | Angola                | 37174067   | 2023             | 3               | 3               | 0      | 0        | 0     | 0     | 0     |
| [76]      | Sudan                 | 48667653   | 2023             | 1664            | 1664            | 7      | 0        | 0     | 0     | 0     |
| [78]      | Ethiopia              | 127E+08    | 2023             | 14249           | 127             | 7      | 0        | 0     | 0     | 0     |
| [76]      | Sao Tome and Principe | 233931     | 2023             | 69              | 69              | 3      | 0        | 0     | 0     | 0     |
| [79]      | Togo                  | 9053799    | 2023             | 8               | 2               | 1      | 0        | 0     | 0     | 0     |
| [76]      | Egypt                 | 113E+08    | 2023             | 578             | 578             | 0      | 0        | 0     | 0     | 0     |
| [78]      | Mauritius             | 1300557    | 2023             | 265             | 265             | 0      | 0        | 0     | 0     | 0     |
| [79]      | Guinea                | 14190612   | 2023             | 6               | 6               | 1      | 0        | 0     | 0     | 0     |
| [78]      | Niger                 | 27202843   | 2023             | 148             | 148             | 0      | 0        | 0     | 0     | 0     |
| [78]      | Nigeria               | 224E+08    | 2023             | 72              | 14              | 0      | 0        | 0     | 0     | 0     |
| [78]      | Ghana                 | 34121985   | 2023             | 18              | 9               | 0      | 0        | 0     | 0     | 0     |
| [78]      | Benin                 | 13712828   | 2023             | 6               | 3               | 1      | 0        | 0     | 0     | 0     |
| [80]      | Burkina Faso          | 23251485   | 2023             | 408             | 56              | 0      | 18       | 0     | 38    | 0     |
| Total     |                       |            |                  | 245,143         | 90,053          | 857    | 542      | 2,551 | 440   | 11    |

## Travel Medicine and Infectious Diseases

### 1 3.3 The spatial distribution of suspected dengue cases in Africa

2 Spatial distribution analysis indicates differences in number and distribution of  
3 suspected dengue cases across African countries and territories. From 2013-2023,  
4 Burkina Faso, Ethiopia and Tanzania reported the highest number of cases,  
5 surpassing 10,000. Reunion and Seychelles reported the highest number of cases  
6 (5,001—10,000) among territories (**Figure 2**).

7

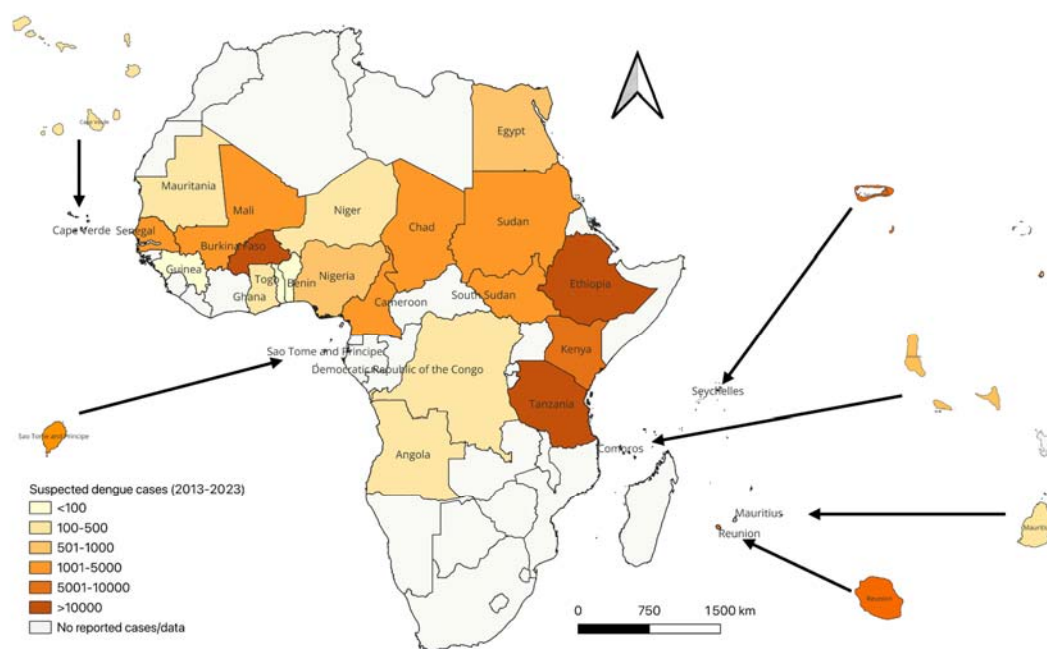

9 Figure 2. A map of Africa illustrating the geographical distribution of suspected  
10 dengue cases in various African countries and territories based on data reported  
11 from 2013-2023. The map was developed using QGIS open-source software version  
12 3.38 accessed at <https://qgis.org/download/>

13

### 14 3.4 A rise in the number of confirmed dengue cases in West Africa

## Travel Medicine and Infectious Diseases

15 Over the past decade, dengue disease burden has increased in Africa, with a 5-fold  
16 increase in West Africa, from approximately 14,000 in 2014 to 70,000 cumulative  
17 confirmed cases in 2023. The region was responsible for approximately 80% of the  
18 confirmed cases (71, 793/89,967) (**Figure 3**).

19

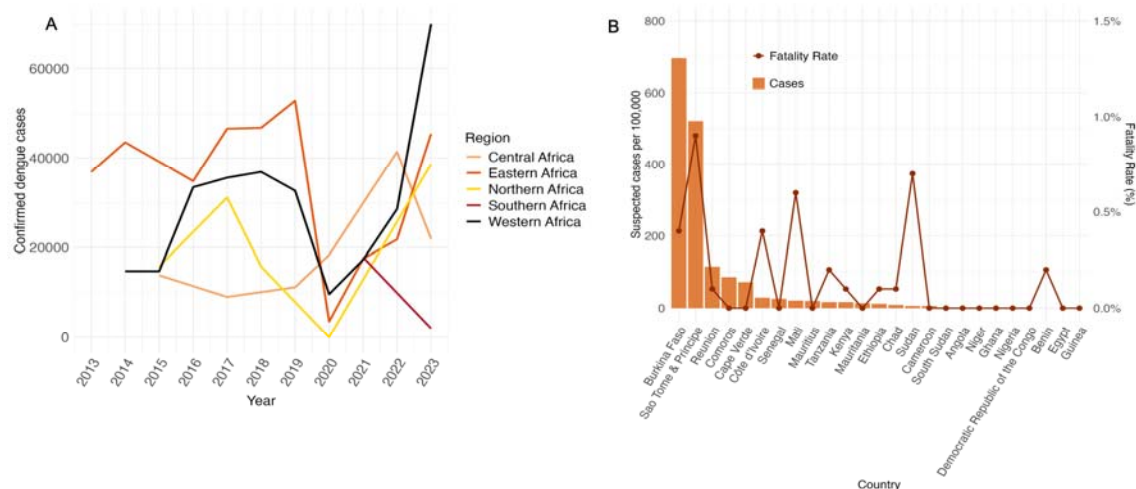

20

21 Figure 3: A. The magnitude and trend of cumulative confirmed dengue cases across  
22 Africa. B. The number of suspected dengue cases per 100,000 population and  
23 fatality rates (%) for specific countries based on data reported from 2013 to 2023.

24 Burkina Faso, and Sao Tome and Principe recorded over 500 cases per 100,000  
25 population surpassing all other countries (Fig 3B). Sao Tome and Principe, Sudan  
26 and Mali reported higher fatality rates of 0.9%, 0.7% and 0.6% respectively.

### 27 3.5 The occurrence of multiple DENV serotypes and severe dengue

28 Since 2013, all four serotypes of DENV, DENV1, DENV2, DENV3, and DENV4)

29 have been reported in Africa. Continentally, DENV1 and DENV2 dominated at

30 different time (**Figure 4**). From 2019 to 2020, DENV1 was predominate serotype in

*Travel Medicine and Infectious Diseases*

31 both Eastern and Western Africa. In 2023, DENV3 dominated Western Africa  
32 whereas DENV2 prevailed in Eastern Africa.  
33

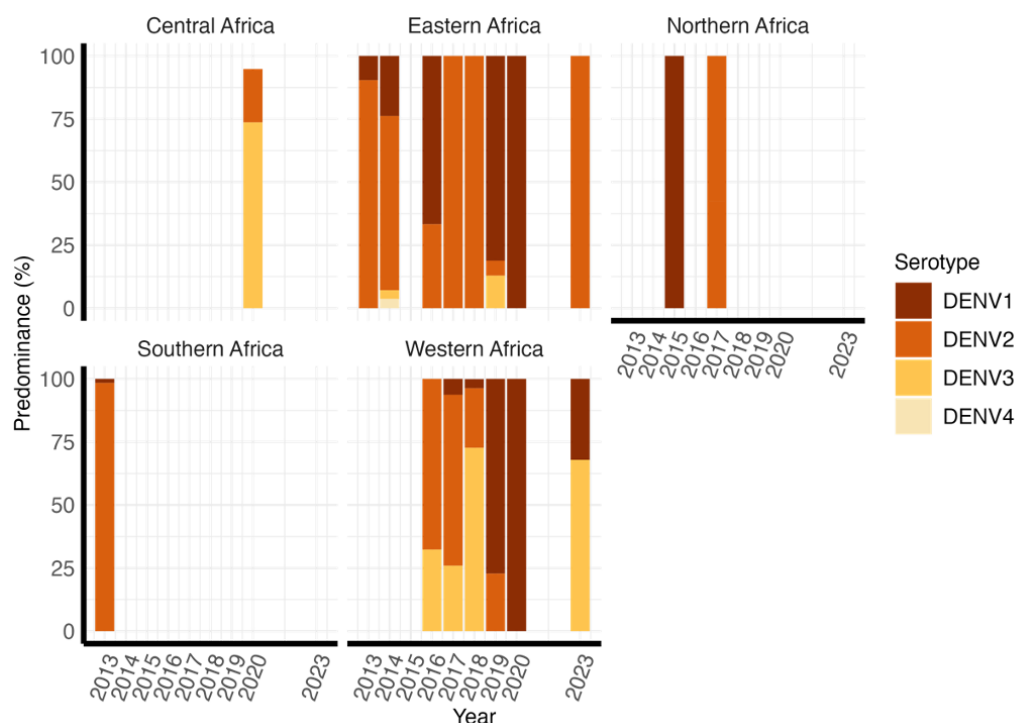

34  
35 Figure 4. Spatiotemporal distribution of DENV serotypes in Africa based on the data  
36 available from 2013 to 2023.  
37 Since 2013, a few cases of severe dengue, specifically Dengue Haemorrhagic Fever  
38 (DHF) and Dengue Shock Syndrome (DSS), have been reported in Africa. Twenty  
39 cases were reported in the United Republic of Tanzania (2014), nine in Burkina Faso  
40 (2015), five in Ethiopia (2017), two in Benin (2019) and 40 in Sudan (2019). Severe  
41 outcomes were associated with diabetes in Tanzania [11], pregnant women in  
42 Burkina Faso [19], male gender in Ethiopia [36] and malaria-dengue co-infection in  
43 Sudan [81].

44

## *Travel Medicine and Infectious Diseases*

### 45 **3.6 Regional differences in transmission seasonality and suitability**

46 Central (**Figure 5A**) and Eastern (**Figure 5B**) Africa experienced prolonged dengue  
47 transmission seasons from April to November. In Central Africa, high peaks were  
48 observed in June (> 400 cases), September (> 1,000) and November (> 700) with a  
49 monthly median of 94 cases. Eastern Africa exhibited a dynamic transmission  
50 pattern with the highest peaks in May and June (> 4,000), September and November  
51 (> 8,000, respectively) with a monthly median of 88 cases. Northern Africa (Figure  
52 5C exhibited sporadic transmission patterns with high peaks in February, July,  
53 August and November (>200, respectively) with a monthly median of 93 cases.  
54 Western Africa (**Figure 5D**) had distinct high transmission seasons with high peaks  
55 in October (> 17,000), November (> 50,000) and December (30,000) and a monthly  
56 median of 98 cases while Southern Africa reported less than 100 cases.  
57 Western Africa reported the highest number of deaths (> 500), followed by Eastern  
58 Africa (> 40). In Western Africa, deaths were mostly reported during the high  
59 transmission season between October and December, whereas in Eastern and  
60 Central Africa, deaths were reported during both the low and high transmission  
61 seasons. There have been no reported fatalities in Northern Africa.



## Travel Medicine and Infectious Diseases

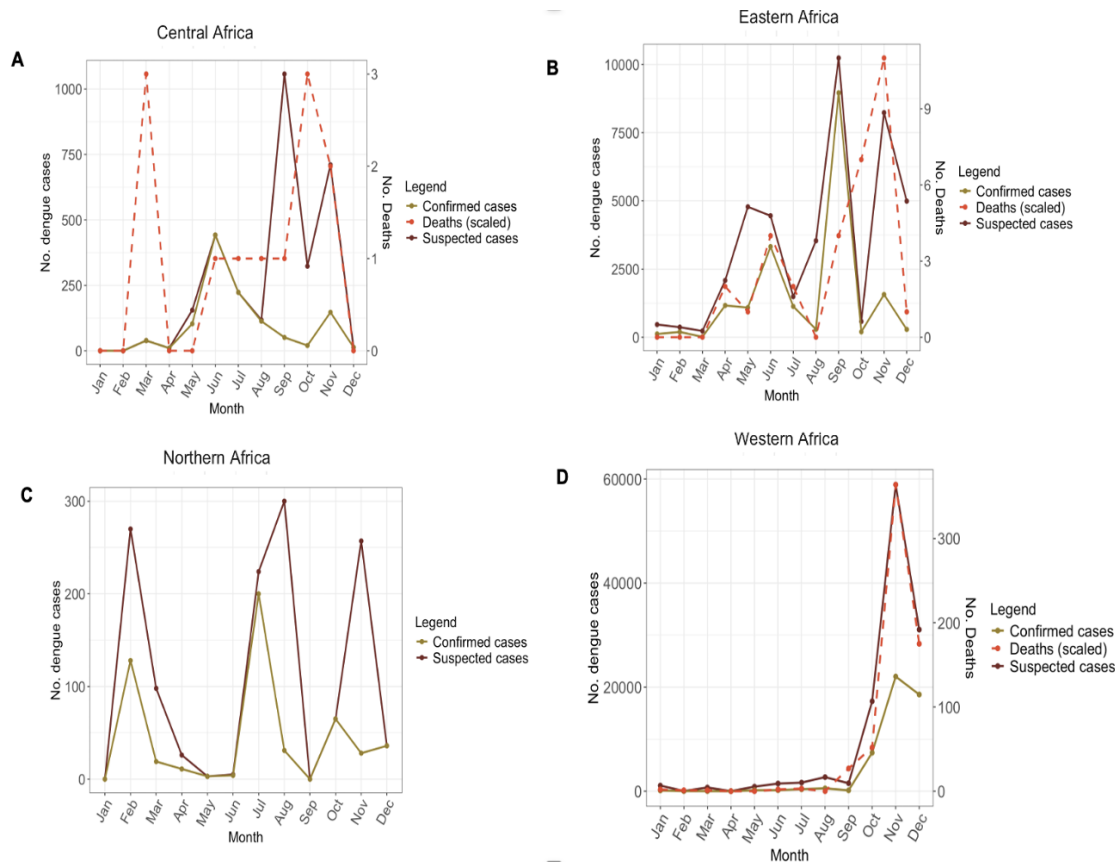

62

63 Figure 5. The seasonality of dengue transmission across regions based on data  
64 available from 2017–2023. A. Central Africa, B. Eastern Africa, C. Northern Africa  
65 and D. Western Africa.

66 Central and Western Africa experience persistent suitability (index  $P > 1$ ) for dengue  
67 transmission between April and November. Eastern Africa exhibits two phases of  
68 transmission suitability (**Figure 6B**), that coincide with short and long rainy seasons  
69 from October to December and March to May, whereas Northern Africa  
70 exhibits transmission suitability between August to November (**Figure 6C**).

71

## Travel Medicine and Infectious Diseases

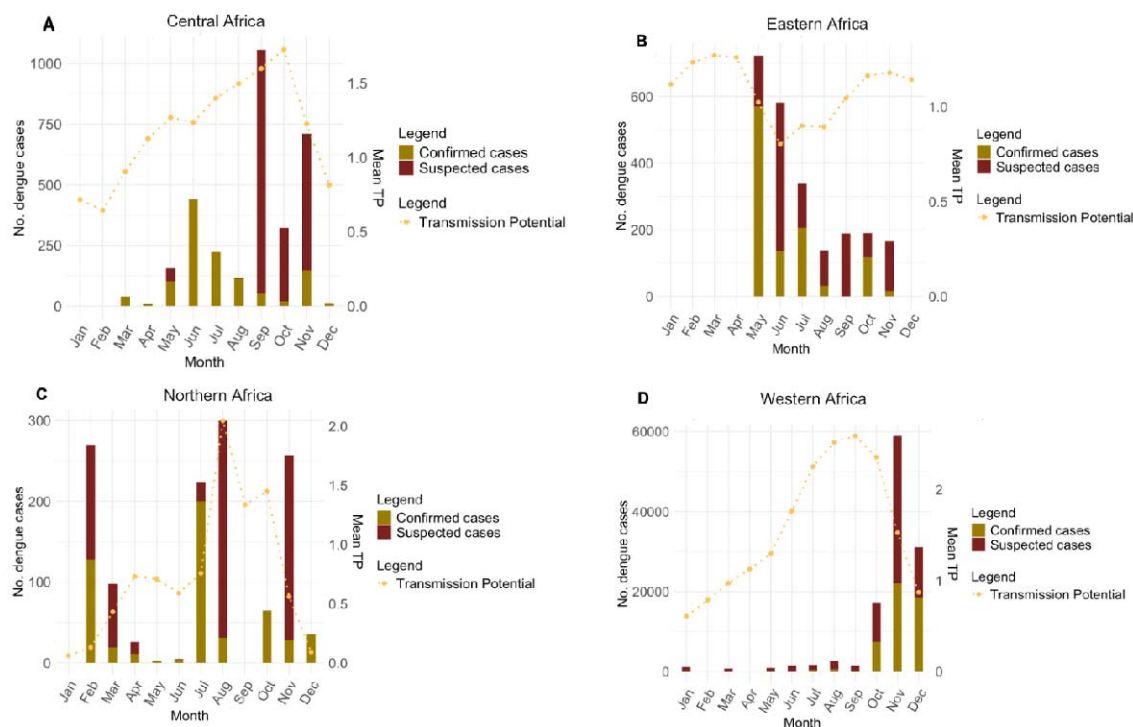

72

73 Figure 6. Dengue transmission potential (TP) across regions based on data

74 available from 2017–2023. A. Central Africa B. Eastern Africa C. Northern Africa

75 and D. Western Africa.

76

### 77 3.7 Increasing trend in the number of predicted dengue cases across Africa

78 The negative binomial model predicted a rising trend in the number of dengue cases

79 in all African regions for each passing year (**Figure 7**) with the growth rate exceeding

80 30% in West Africa (**Table 2**). There were limited cases from Southern Africa that

81 could be included in the model.

82

*Travel Medicine and Infectious Diseases*

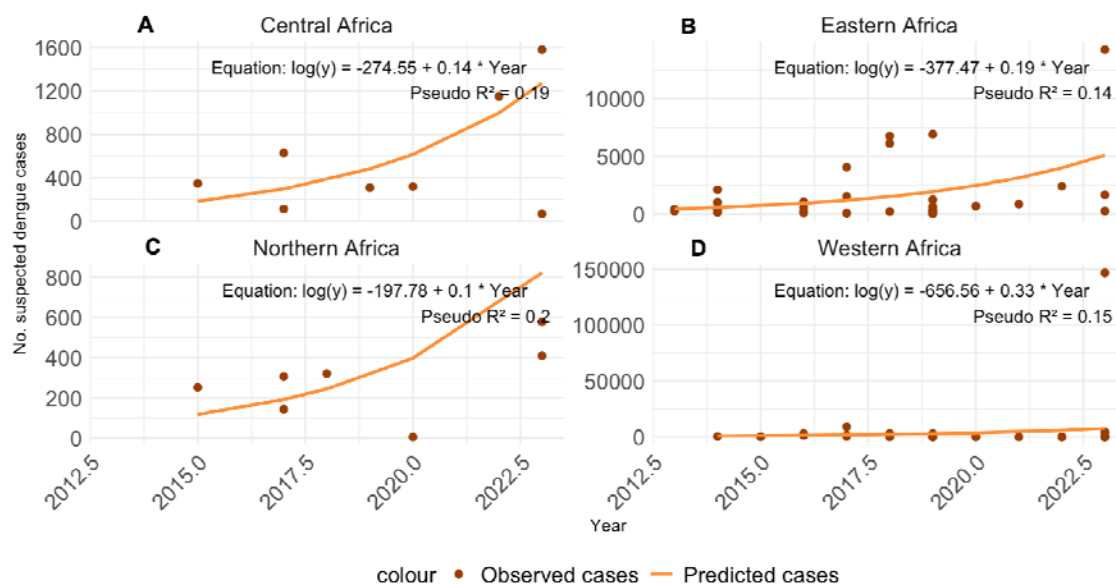

83

84 Figure 7. Predicted dengue cases across regions based on a negative binomial  
 85 model using data reported from 2013–2023. A. Central Africa B. Eastern Africa, C.  
 86 Northern Africa and D. Western Africa.

87

88 **Table 2.** Growth of predicted dengue cases in Africa regions according to negative  
 89 binomial model using data available from 2013–2023.

| Region          | Year coefficient ( ) | Multiplicative factor ( ) | Growth rate (%) /year |
|-----------------|----------------------|---------------------------|-----------------------|
| Western Africa  | 0.33                 | 1.39                      | 39                    |
| Eastern Africa  | 0.19                 | 1.21                      | 21                    |
| Central Africa  | 0.14                 | 1.15                      | 15                    |
| Northern Africa | 0.10                 | 1.11                      | 11                    |

90

91 **4. Discussion**

92 Dengue represents a significant public health threat in Africa. However, the non-  
 93 specific clinical presentation of the disease, which resembles malaria and other  
 94 febrile illnesses such as yellow fever and chikungunya, limits better detection,  
 95 reporting and understanding of the disease burden. Additionally, there are limited

## *Travel Medicine and Infectious Diseases*

96 health resources for surveillance and timely detection [82]. This review presents the  
97 first systematic analysis to define the epidemiological trends of dengue disease  
98 burden in Africa and associated territories from 2013 to 2023. The findings of this  
99 review can inform the strengthening of intervention strategies to reduce morbidity  
100 and mortality of dengue in Africa.

101 The spatial analysis reveals disparities in the quantity and distribution of suspected  
102 dengue cases across Africa (**Figure 2**). This observation may indicate gaps in  
103 epidemiological surveillance and case reporting, given that tropical regions in Africa  
104 shares similar vector ecologies and transmission indices. Overall, West Africa was  
105 responsible for more than two-thirds of confirmed dengue cases and one-third of  
106 surveillance reports, indicating increasing transmission activities and improved case  
107 reporting in this region.

108 Burkina Faso recorded the highest burden of cases per 100,000 population (**Figure**  
109 **3**). In 2023, the country accounted for more than 80% of confirmed cases and  
110 deaths. These estimates are consistent with the World Health Organization's  
111 surveillance report on health emergency situations [83]. The impact of climate  
112 hazards on the distribution of vectors and extensive international travels of infected  
113 individuals from endemic countries are likely to exacerbate dengue transmission  
114 through spillover events and introductions, respectively [84,85].

115 There are several probable factors that may have contributed to dengue  
116 transmission in Western Africa over the past decade. Several studies have  
117 demonstrated that the abundance of *Aedes aegypti* breeding habitats, particularly  
118 waste tyres, was a significant factor for transmission, particularly in peri urban  
119 centres [86,87]. Other studies have revealed that dengue outbreaks in Western

## *Travel Medicine and Infectious Diseases*

120 Africa are driven by the presence of abundant infected *Aedes* vectors [88]. In 2023,  
121 Ouédraogo and others reported the presence of a high number of immature *Aedes*  
122 *aegypti* vectors in the handwashing stations that were constructed in public areas  
123 during the COVID-19 pandemic in Burkina Faso [89].

124 Despite a significant increase in the number of dengue cases, case fatality rate  
125 remains below 1% in Africa (**Figure 3**), compared to 3%–10% in Asia [90]. Given the  
126 continuous circulation of multiple DENV serotypes within the same region (**Figure 4**),  
127 more cases of severe dengue were expected due to lack of cross immunity.

128 However, it is possible that limited diagnostic capabilities, and under-reporting due to  
129 misdiagnosis with other febrile illnesses, such as malaria are contributing to low  
130 prevalence [91]. Further, genetic evidence from global ancestral analysis suggests  
131 that African descendants may be protective against dengue haemorrhagic  
132 phenotype [92].

133 The seasonality of dengue transmission in Africa shows regional differences (**Figure**  
134 **5**), with Central and Eastern Africa experiencing long transmission seasons that  
135 coinciding with rainy seasons from May to November in Central Africa (**Figure 5A**)  
136 and from April to May and November to December in Eastern Africa (**Figure 5B**).

137 The erratic transmission pattern observed in Northern Africa (**Figure 5C**), may be  
138 attributed to various factors including the storage of water in open containers [93,94]  
139 and heavy rainfall [95], that attract *Aedes* mosquitoes. Moreover, there are inter-  
140 regional migrations of people from endemic countries and extensive intra-regional  
141 trade activities that play a significant role in the transmission of dengue [93]. Western  
142 Africa exhibits a distinct high transmission season between October and December.

## *Travel Medicine and Infectious Diseases*

143 These observations are consistent with the results from previous studies conducted  
144 in this region [96,97].

145 From April to November, Central and Western Africa (**Figure 6A and 6D**), exhibit  
146 long transmission suitability periods (Index  $P > 1.0$ ) that correlate with the annual  
147 rainfall seasons [98,99]. In contrast, high transmission potential in Eastern Africa  
148 (**Figure 6B**), correlates with two rainy seasons from September to December and  
149 from March to May [100]. The low number of dengue cases reported in Northern  
150 Africa could be due to a short transmission suitability period between August to  
151 October. In general, West Africa experiences the highest transmission suitability  
152 (Index  $P > 2.0$ ) between July and November in comparison to other regions. The  
153 prolonged period of transmission suitability may have contributed to the rise of  
154 Western Africa as a hotspot of dengue transmission.

155 The negative binomial model predicted an increasing trend of suspected dengue  
156 cases across Central, Eastern and Western Africa (**Figure 7**), with a growth rate  
157 exceeding 30% in West Africa (**Table 2**). Results from previously described climate  
158 suitability models indicate that these regions will experience significant growth in  
159 dengue incidences over the coming decades [101]. These findings will aid to inform  
160 healthcare policy and practices in Africa to enhance surveillance and implement  
161 effective interventions to prevent ongoing dengue transmission.

### 162 **Limitations**

163 The results of this review are subject to several limitations. First, confirmed case  
164 counts may be underestimated due to the application of different case definitions.  
165 Second, limited dengue surveillance and case reporting between 2020–2022 period  
166 due to COVID-19 pandemic introduces bias in estimating dengue burden. Third,

## *Travel Medicine and Infectious Diseases*

167 confirmed cases among travellers returning from African countries and territories  
168 were not included. Therefore, dengue burden estimates reported in this report should  
169 be interpreted with caution.

170

### 171 **5. Conclusions**

172 Over the past decade, there has been a rise in the number of confirmed dengue  
173 cases, particularly in West Africa. The persistent presence of multiple DENV  
174 serotypes within the same region increases the likelihood of severe dengue due to  
175 the lack of cross-immunity. It is important to strengthen surveillance and implement  
176 region-specific interventions to prevent future dengue outbreaks. We advocate  
177 further research for understanding the evolution and transmission dynamics of the  
178 specific dengue virus lineages in Africa.

179

### 180 **Funding**

181 Research activities at KRISP and CERl are supported in part by grants from the  
182 Rockefeller Foundation (HTH 017), the Abbott Pandemic Defense Coalition (APDC),  
183 the National Institute of Health USA (U01 AI151698) for the United World Antivirus  
184 Research Network (UWARN), the SAMRC South African mRNA Vaccine Consortium  
185 (SAMVAC), Global Health EDCTP3 Joint Undertaking and its members as well as  
186 Bill & Melinda Gates Foundation (101103171), the Health Emergency Preparedness  
187 and Response Umbrella Program (HEPR Program), managed by the World Bank  
188 Group (TF0B8412), the UK's Medical Research Foundation (MRF-RG-ICCH-2022-  
189 100069), and the Wellcome Trust for the Global health project (228186/Z/23/Z). The  
190 content and findings reported herein are the sole deduction, view and responsibility

*Travel Medicine and Infectious Diseases*

191 of the researcher/s and do not reflect the official position and sentiments of the  
192 funding agencies.

193 **Institutional review board statement**

194 No ethical clearance because this is a review of published research.

195 **Informed consent statement**

196 Not applicable

197

198

199 **Data availability statement**

200 All the relevant data are contained within the manuscript. Any additional data is

201 made available through Mendeley data repository accessible at

202 <https://data.mendeley.com/my-data/>.

203 **Authors' contributions**

204 **Gasparly O. Mwanyika:** Conceptualization, data curation, formal analysis,

205 methodology, validation, writing-original draft, writing-reviewing & editing.

206 **Abdualmoniem O. Musa:** Data curation and writing-reviewing & editing. **Jenicca**

207 **Poongavanan:** Methodology, writing-reviewing & editing. **Monika Moir:**

208 Methodology, Writing-reviewing & editing. **Graeme Dor:** Writing-review & editing.

209 **Eduan Wilkinson:** Writing-reviewing & editing. **Cheryl Baxter:** Methodology, project

210 administration, writing-original draft, writing-reviewing & editing. **Tulio de Oliveira:**

211 Resources, funding acquisition, project administration, validation, writing-reviewing &

212 editing. **Houriyyah Tegally:** Methodology, data curation, validation, writing-original

213 draft and writing-reviewing & editing.

214 **Competing interest**



## *Travel Medicine and Infectious Diseases*

215 The authors declare no competing interest in this work.

### 216 **Acknowledgements**

217 We acknowledge the World Health Organization for Africa (#WHOAFro) and Africa  
218 Centers for Disease Control and Prevention (#AfricaCDC) that made epidemiological  
219 surveillance reports for different countries accessible. We also express our gratitude  
220 to all the members of the Climate Amplified Disease Epidemics (#CLIMADE)  
221 consortium for their valuable contributions in this review.

222

### 223 **Supplementary materials**

224 Mwanyika, Gaspary (2024), "S1. Advanced search strategy for PubMed/Medline  
225 databases", Mendeley Data, V1, <https://data.mendeley.com/datasets/zf7x7wy7xq/1>

226

227 Mwanyika, Gaspary (2024), "S2. Excluded articles for specific reasons.", Mendeley  
228 Data, V1, <https://data.mendeley.com/datasets/3gjypt9yvs/1>

229

230 Mwanyika, Gaspary (2024), "S3. PRISMA 2020 checklist", Mendeley Data, V1,  
231 <https://data.mendeley.com/datasets/hx4r4jywmb/1>

232

233 Mwanyika, Gaspary (2024), "S4. R programming codes ", Mendeley Data, V1,  
234 <https://data.mendeley.com/datasets/d9kyhgxsx2m/1>

235

236 Mwanyika, Gaspary (2024), "S5. Transmission potential (Index P) data", Mendeley  
237 Data, V1, <https://data.mendeley.com/datasets/cv9c4gzdy9/1>

238

### 239 **References**

- 240 [1] Weaver SC, Reisen WK. Present and future arboviral threats. *Antiviral Res*  
241 2010;85:328–45. doi: 10.1016/j.antiviral.2009.10.008.
- 242 [2] Murray NEA, Quam MB, Wilder-Smith A. Epidemiology of dengue: past, present  
243 and future prospects. *Clin Epidemiol* 2013;5:299–309.  
244 <https://doi.org/10.2147/CLEP.S34440>.
- 245 [3] Bhatt S, Gething PW, Brady OJ, Messina JP, Farlow AW, Moyes CL, et al. The  
246 global distribution and burden of dengue. *Nature* 2013;496:504–7.  
247 <https://doi.org/10.1038/nature12060>.
- 248 [4] Riccò M, Peruzzi S, Balzarini F, Zaniboni A, Ranzieri S. Dengue Fever in Italy:  
249 The "Eternal Return" of an Emerging Arboviral Disease. *Trop Med Infect Dis*  
250 2022;7:10. <https://doi.org/10.3390/tropicalmed7010010>.

*Travel Medicine and Infectious Diseases*

- 251 [5] Ryan SJ, Carlson CJ, Mordecai EA, Johnson LR. Global expansion and  
252 redistribution of Aedes-borne virus transmission risk with climate change. *PLoS*  
253 *Negl Trop Dis* 2019;13:e0007213. <https://doi.org/10.1371/journal.pntd.0007213>.
- 254 [6] Amarasinghe A, Kuritsk JN, Letson GW, Margolis HS. Dengue virus infection in  
255 Africa. *Emerg Infect Dis* 2011;17:1349–54.  
256 <https://doi.org/10.3201/eid1708.101515>.
- 257 [7] Eltom K, Enan K, El Hussein ARM, Elkhidir IM. Dengue Virus Infection in Sub-  
258 Saharan Africa Between 2010 and 2020: A Systematic Review and Meta-  
259 Analysis. *Front Cell Infect Microbiol* 2021;11:678945.  
260 <https://doi.org/10.3389/fcimb.2021.678945>.
- 261 [8] Mwanyika GO, Mboera LE, Rugarabamu S, Ngingo B, Sindato C, Lutwama JJ, et  
262 al. Dengue virus infection and associated risk factors in Africa: a systematic  
263 review and meta-analysis. *Viruses* 2021;13:536.
- 264 [9] Selçuk AA. A Guide for Systematic Reviews: PRISMA. *Turk Arch*  
265 *Otorhinolaryngol* 2019;57:57–8. <https://doi.org/10.5152/tao.2019.4058>.
- 266 [10] Nakase T, Giovanetti M, Obolski U, Lourenço J. Global transmission suitability  
267 maps for dengue virus transmitted by *Aedes aegypti* from 1981 to 2019. *Sci Data*  
268 2023; 10:275. <https://doi.org/10.1038/s41597-023-02170-7>.
- 269 [11] Boillat-Blanco N, Klaassen B, Mbarack Z, Samaka J, Mlaganile T, Masimba J,  
270 et al. Dengue fever in Dar es Salaam, Tanzania: clinical features and outcome in  
271 populations of black and non-black racial category. *BMC Infect Dis* 2018;18:644.  
272 <https://doi.org/10.1186/s12879-018-3549-z>.
- 273 [12] Ellis EM, Neatherlin JC, Delorey M, Ochieng M, Mohamed AH, Mogeni DO, et  
274 al. A household serosurvey to estimate the magnitude of a dengue outbreak in  
275 Mombasa, Kenya, 2013. *PLoS Negl Trop Dis* 2015;9:e0003733.  
276 <https://doi.org/10.1371/journal.pntd.0003733>.
- 277 [13] World Health Organization (WHO). Dengue outbreak in the United Republic of  
278 Tanzania (Situation as of 30 May 2014). United Republic of Tanzania: World  
279 Health Organization, [https://reliefweb.int/report/united-republic-tanzania/dengue-](https://reliefweb.int/report/united-republic-tanzania/dengue-outbreak-united-republic-tanzania-situation-30-may-2014)  
280 [outbreak-united-republic-tanzania-situation-30-may-2014](https://reliefweb.int/report/united-republic-tanzania/dengue-outbreak-united-republic-tanzania-situation-30-may-2014). ; 2014 [accessed 29  
281 November 2023].
- 282 [14] Ahmed A, Ali Y, Elmagboul B, Mohamed O, Elduma A, Bashab H, et al. Dengue  
283 Fever in the Darfur Area, Western Sudan. *Emerg Infect Dis* 2019;25:2126.  
284 <https://doi.org/10.3201/eid2511.181766>.
- 285 [15] Vairo F, Mboera LE, De Nardo P, Oriyo NM, Meschi S, Rumisha SF, et al.  
286 Clinical, virologic, and epidemiologic characteristics of dengue outbreak, Dar es  
287 Salaam, Tanzania, 2014. *Emerg Infect Dis* 2016;22:895. doi:  
288 10.3201/eid2205.151462.
- 289 [16] Shah MM, Ndenga BA, Mutuku FM, Vu DM, Grossi-Soyster EN, Okuta V, et al.  
290 High dengue burden and circulation of 4 virus serotypes among children with  
291 undifferentiated fever, Kenya, 2014–2017. *Emerg Infect Dis* 2020;26:2638.  
292 doi: 10.3201/eid2611.200960.
- 293 [17] Onyedibe K. A cross sectional study of dengue virus infection in febrile patients  
294 presumptively diagnosed of malaria in Maiduguri and Jos plateau, Nigeria.  
295 *Malawi Med J* 2018;30:276–82. doi: 10.4314/mmj.v30i4.11.
- 296 [18] Ngoi CN, Price MA, Fields B, Bonventure J, Ochieng C, Mwashigadi G, et al.  
297 Dengue and chikungunya virus infections among young febrile adults evaluated

*Travel Medicine and Infectious Diseases*

- 298 for acute HIV-1 infection in coastal Kenya. PLoS One 2016;11:e0167508. doi:  
299 10.1371/journal.pone.0167508.
- 300 [19] Sondo KA, Ouattara A, Diendéré EA, Diallo I, Zoungrana J, Zémané G, et al.  
301 Dengue infection during pregnancy in Burkina Faso: a cross-sectional study.  
302 BMC Infect Dis 2019;19:997. <https://doi.org/10.1186/s12879-019-4587-x>.
- 303 [20] Nkenfou CN, Fainguem N, Dongmo-Nguefack F, Yatchou LG, Kameni JJK,  
304 Elong EL, et al. Enhanced passive surveillance dengue infection among febrile  
305 children: Prevalence, co-infections and associated factors in Cameroon. PLoS  
306 Negl Trop Dis 2021;15:e0009316. doi: 10.1371/journal.pntd.0009316.
- 307 [21] World Health Organization (WHO). Dengue– Egypt. Disease Outbreak News.  
308 World Health Organization (WHO), [https://www.who.int/emergencies/disease-](https://www.who.int/emergencies/disease-outbreak-news/item/12-november-2015-dengue-en)  
309 [outbreak-news/item/12-november-2015-dengue-en](https://www.who.int/emergencies/disease-outbreak-news/item/12-november-2015-dengue-en); 2015 [accessed 29 November  
310 2023].
- 311 [22] Dieng I, Hedible BG, Diagne MM, El Wahed AA, Diagne CT, Fall C, et al. Mobile  
312 Laboratory Reveals the Circulation of Dengue Virus Serotype I of Asian Origin in  
313 Medina Gounass (Guediawaye), Senegal. Diagn Basel Switz 2020;10:408.  
314 <https://doi.org/10.3390/diagnostics10060408>.
- 315 [23] Tarnagda Z, Cissé A, Bicaba BW, Diagbouga S, Sagna T, Ilboudo AK, et al.  
316 Dengue Fever in Burkina Faso, 2016. Emerg Infect Dis 2018;24:170–2.  
317 <https://doi.org/10.3201/eid2401.170973>.
- 318 [24] Proesmans S, Katshongo F, Milambu J, Fungula B, Muhindo Mavoko H, Ahuka-  
319 Mundeke S, et al. Dengue and chikungunya among outpatients with acute  
320 undifferentiated fever in Kinshasa, Democratic Republic of Congo: A cross-  
321 sectional study. PLoS Negl Trop Dis 2019;13:e0007047.  
322 <https://doi.org/10.1371/journal.pntd.0007047>.
- 323 [25] Hamid Z, Hamid T, Alsedig K, Abdallah T, Elaagip A, Ahmed A, et al. Molecular  
324 Investigation of Dengue Virus Serotype 2 Circulation in Kassala State, Sudan.  
325 Jpn J Infect Dis 2019;72:58–61. <https://doi.org/10.7883/yoken.JJID.2018.267>.
- 326 [26] International Federation of Red Cross and Red Crescent Societies (IFRC).  
327 Seychelles: Dengue Outbreak Emergency Plan of Action Final Report DREF  
328 Operation n° MDRSC004. International Federation of Red Cross and Red  
329 Crescent Societies (IFRC), [https://reliefweb.int/report/seychelles/seychelles-dengue-](https://reliefweb.int/report/seychelles/seychelles-dengue-outbreak-emergency-plan-action-final-report-dref-operation-n)  
330 [outbreak-emergency-plan-action-final-report-dref-operation-n](https://reliefweb.int/report/seychelles/seychelles-dengue-outbreak-emergency-plan-action-final-report-dref-operation-n); 2016 [accessed 29  
331 November 2023].
- 332 [27] World Health Organization (WHO). Dengue Fever – Burkina Faso. Disease  
333 Outbreak News. World Health Organization (WHO),  
334 [https://www.who.int/emergencies/disease-outbreak-news/item/18-november-2016-](https://www.who.int/emergencies/disease-outbreak-news/item/18-november-2016-dengue-burkina-faso-en)  
335 [dengue-burkina-faso-en](https://www.who.int/emergencies/disease-outbreak-news/item/18-november-2016-dengue-burkina-faso-en); 2016 [accessed 29 November 2023].
- 336 [28] Masika MM, Korhonen EM, Smura T, Uusitalo R, Vapalahti K, Mwaengo D, et  
337 al. Detection of dengue virus type 2 of Indian origin in acute febrile patients in  
338 rural Kenya. PLoS Negl Trop Dis 2020;14:e0008099.  
339 <https://doi.org/10.1371/journal.pntd.0008099>.
- 340 [29] Neto Z, Martinez PA, Hill SC, Jandondo D, Thézé J, Mirandela M, et al.  
341 Molecular and genomic investigation of an urban outbreak of dengue virus  
342 serotype 2 in Angola, 2017–2019. PLoS Negl Trop Dis 2022;16:e0010255.  
343 <https://doi.org/10.1371/journal.pntd.0010255>.

## *Travel Medicine and Infectious Diseases*

- 344 [30] World Health Organization (WHO). Dengue – Burkina Faso. Disease Outbreak  
345 News. World Health Organization (WHO), [https://www.who.int/emergencies/disease-](https://www.who.int/emergencies/disease-outbreak-news/item/6-november-2017-dengue-burkina-faso-en)  
346 [outbreak-news/item/6-november-2017-dengue-burkina-faso-en](https://www.who.int/emergencies/disease-outbreak-news/item/6-november-2017-dengue-burkina-faso-en); 2017 [accessed 29  
347 November 2023].
- 348 [31] World Health Organization (WHO) | Regional Office for Africa. Weekly bulletins  
349 on outbreaks and other emergencies. World Health Organization (WHO),  
350 <https://iris.who.int/bitstream/handle/10665/258888/OEW35-268192017.pdf?sequence=1>;  
351 2017 [accessed 29 November 2023].
- 352 [32] El-Kady AM, Osman HA, Alemam MF, Marghani D, Shanawaz MA, Wakid MH,  
353 et al. Circulation of Dengue Virus Serotype 2 in Humans and Mosquitoes During  
354 an Outbreak in El Quseir City, Egypt. *Infect Drug Resist* 2022;15:2713–21.  
355 <https://doi.org/10.2147/IDR.S360675>.
- 356 [33] World Health Organization (WHO). Weekly bulletins on outbreaks and other  
357 emergencies. World Health Organization (WHO),  
358 <https://iris.who.int/bitstream/handle/10665/258888/OEW35-268192017.pdf?sequence=1>;  
359 2017 [accessed 29 November 2023].
- 360 [34] World Health Organization (WHO). Weekly epidemiological monitor. World  
361 Health Organization (WHO),  
362 [https://applications.emro.who.int/docs/epi/2017/Epi\\_Monitor\\_2017\\_10\\_49.pdf](https://applications.emro.who.int/docs/epi/2017/Epi_Monitor_2017_10_49.pdf); 2017 [  
363 accessed 29 November 2023].
- 364 [35] Mouiche MMM, Ntumvi NF, Maptue VT, Tamoufe U, Albert B, Ngum Ndze V, et  
365 al. Evidence of Low-Level Dengue Virus Circulation in the South Region of  
366 Cameroon in 2018. *Vector Borne Zoonotic Dis* 2020;20:314–7.  
367 <https://doi.org/10.1089/vbz.2019.2531>.
- 368 [36] Gutu MA, Bekele A, Seid Y, Mohammed Y, Gemechu F, Woyessa AB, et al.  
369 Another dengue fever outbreak in Eastern Ethiopia-An emerging public health  
370 threat. *PLoS Negl Trop Dis* 2021;15:e0008992.  
371 <https://doi.org/10.1371/journal.pntd.0008992>.
- 372 [37] Letizia AG, Pratt CB, Wiley MR, Fox AT, Mosore M, Agbodzi B, et al.  
373 Retrospective Genomic Characterization of a 2017 Dengue Virus Outbreak,  
374 Burkina Faso. *Emerg Infect Dis* 2022;28:1198–210.  
375 <https://doi.org/10.3201/eid2806.212491>.
- 376 [38] World Health Organization (WHO). Weekly bulletins on outbreaks and other  
377 emergencies. In: WHO | Regional Office for Africa. Mali,  
378 <https://iris.who.int/bitstream/handle/10665/259809/OEW1-2018.pdf?sequence=1>; 2018  
379 [accessed 29 November 2023].
- 380 [39] Mouiche MMM, Ntumvi NF, Maptue VT, Tamoufe U, Albert B, Ngum Ndze V, et  
381 al. Evidence of Low-Level Dengue Virus Circulation in the South Region of  
382 Cameroon in 2018. *Vector Borne Zoonotic Dis* 2020;20:314–7.  
383 <https://doi.org/10.1089/vbz.2019.2531>.
- 384 [40] World Health Organization (WHO). Outbreaks and other emergencies updates.  
385 In: WHO | Regional Office for Africa, [https://www.afro.who.int/health-topics/disease-](https://www.afro.who.int/health-topics/disease-outbreaks/outbreaks-and-other-emergencies-updates?page=14)  
386 [outbreaks/outbreaks-and-other-emergencies-updates?page=14](https://www.afro.who.int/health-topics/disease-outbreaks/outbreaks-and-other-emergencies-updates?page=14); 2017 [accessed 29  
387 November 2023].
- 388 [41] World Health Organization (WHO). World Health Organization. Weekly bulletins  
389 on outbreaks and other emergencies. In: WHO | Regional Office for Africa,



*Travel Medicine and Infectious Diseases*

- 390 <https://iris.who.int/bitstream/handle/10665/259809/OEW1-2018.pdf?sequence=1>; 2017  
391 [accessed 29 November 2023].
- 392 [42] World Health Organization (WHO). Weekly bulletins on outbreaks and other  
393 emergencies. In: WHO | Regional Office for Africa,  
394 <https://iris.who.int/bitstream/handle/10665/277423/OEW52-2228122018.pdf>; 2018  
395 [accessed 29 November 2023].
- 396 [43] World Health Organization (WHO). Weekly bulletins on outbreaks and other  
397 emergencies. In: WHO | Regional Office for Africa,  
398 <https://iris.who.int/bitstream/handle/10665/278952/OEW01-29122018-\04012019.pdf>;  
399 2018 [accessed 29 November 2023].
- 400 [44] World Health Organization (WHO). Weekly bulletins on outbreaks and other  
401 emergencies. In: WHO | Regional Office for Africa,  
402 <https://iris.who.int/bitstream/handle/10665/278952/OEW01-29122018-\04012019.pdf>;  
403 2018 [accessed November 29, 2023].
- 404 [45] Bonney JHK, Hayashi T, Dadzie S, Agbosu E, Pratt D, Nyarko S, et al.  
405 Molecular detection of dengue virus in patients suspected of Ebola virus disease  
406 in Ghana. *PloS One* 2018;13:e0208907.  
407 <https://doi.org/10.1371/journal.pone.0208907>.
- 408 [46] Ayolabi CI, Olusola BA, Ibemgbo SA, Okonkwo GO. Detection of Dengue  
409 viruses among febrile patients in Lagos, Nigeria and phylogenetics of circulating  
410 Dengue serotypes in Africa. *Infect Genet Evol J Mol Epidemiol Evol Genet Infect*  
411 *Dis* 2019;75:103947. <https://doi.org/10.1016/j.meegid.2019.103947>.
- 412 [47] Vincent M, Larrieu S, Vilain P, Etienne A, Solet J-L, François C, et al. From the  
413 threat to the large outbreak: dengue on Reunion Island, 2015 to 2018.  
414 *Eurosurveillance* 2019;24:1900346. [https://doi.org/10.2807/1560-](https://doi.org/10.2807/1560-7917.ES.2019.24.47.1900346)  
415 [7917.ES.2019.24.47.1900346](https://doi.org/10.2807/1560-7917.ES.2019.24.47.1900346).
- 416 [48] Gaye A, Ndiaye T, Sy M, Deme AB, Thiaw AB, Sene A, et al. Genomic  
417 investigation of a dengue virus outbreak in Thiès, Senegal, in 2018. *Sci Rep*  
418 2021;11:10321. <https://doi.org/10.1038/s41598-021-89070-1>.
- 419 [49] Dieng I, Fall C, Barry MA, Gaye A, Dia N, Ndione MHD, et al. Re-emergence of  
420 dengue serotype 3 in the context of a large religious gathering event in Touba,  
421 Senegal. *Int J Environ Res Public Health* 2022;19:16912.
- 422 [50] World Health Organization (WHO). Weekly bulletins on outbreaks and other  
423 emergencies. In: WHO | Regional Office for Africa,  
424 <https://iris.who.int/bitstream/handle/10665/277423/OEW52-2228122018.pdf>; 2018  
425 [accessed 29 November 2023].
- 426 [51] World Health Organization (WHO) | Regional Office for Africa. Weekly bulletins  
427 on outbreaks and other emergencies. In: WHO | Regional Office for Africa,  
428 [https://www.who.int/docs/default-source/who-afro-outbreaks-and-emergencies-](https://www.who.int/docs/default-source/who-afro-outbreaks-and-emergencies-updates/oew15-0814042019.pdf)  
429 [updates/oew15-0814042019.pdf](https://www.who.int/docs/default-source/who-afro-outbreaks-and-emergencies-updates/oew15-0814042019.pdf); 2019 [accessed 29 November 2023].
- 430 [52] World Health Organization (WHO). Weekly bulletins on outbreaks and other  
431 emergencies. In: WHO | Regional Office for Africa,  
432 <https://iris.who.int/bitstream/handle/10665/330353/OEW01-05012020.pdf>; 2020  
433 [accessed 29 November 2023].
- 434 [53] World Health Organization (WHO). Weekly bulletins on outbreaks and other  
435 emergencies. In: WHO | Regional Office for Africa,

*Travel Medicine and Infectious Diseases*

- 436 <https://iris.who.int/bitstream/handle/10665/326596/OEW34-1925082019.pdf>; 2019  
437 [accessed 29 November 2023].
- 438 [54] World Health Organization (WHO). Weekly bulletins on outbreaks and other  
439 emergencies. In: WHO | Regional Office for Africa,  
440 <https://iris.who.int/bitstream/handle/10665/328778/OEW40-300906102019.pdf>; 2019  
441 [accessed 29 November 2023].
- 442 [55] World Health Organization (WHO). Weekly bulletins on outbreaks and other  
443 emergencies. In: WHO | Regional Office for Africa,  
444 <https://iris.who.int/bitstream/handle/10665/330353/OEW01-05012020.pdf>; 2020  
445 [accessed 29 November 2023].
- 446 [56] Desogi M, Ali M, Gindeel N, Khalid F, Abdelraheem M, Alnaby A, et al.  
447 Detection of dengue virus serotype 4 in Sudan. *East Mediterr Health J Rev Sante*  
448 *Mediterr Orient Al-Majallah Al-Sihhiyah Li-Sharq Al-Mutawassit* 2023;29:436–41.  
449 <https://doi.org/10.26719/emhj.23.041>.
- 450 [57] Eldigail MH, Abubaker HA, Khalid FA, Abdallah TM, Musa HH, Ahmed ME, et  
451 al. Association of genotype III of dengue virus serotype 3 with disease outbreak  
452 in Eastern Sudan, 2019. *Virol J* 2020;17:118. <https://doi.org/10.1186/s12985-020-01389-9>.
- 453
- 454 [58] Hafsia S, Barbar T, Wilkinson DA, Atyame C, Biscornet L, Bibi J, et al. Genetic  
455 characterization of dengue virus serotype 1 circulating in Reunion Island, 2019-  
456 2021, and the Seychelles, 2015-2016. *BMC Infect Dis* 2023;23:294.  
457 <https://doi.org/10.1186/s12879-023-08125-y>.
- 458 [59] Ahmed A, Eldigail M, Elduma A, Breima T, Dietrich I, Ali Y, et al. First report of  
459 epidemic dengue fever and malaria co-infections among internally displaced  
460 persons in humanitarian camps of North Darfur, Sudan. *Int J Infect Dis IJID Off*  
461 *Publ Int Soc Infect Dis* 2021;108:513–6. <https://doi.org/10.1016/j.ijid.2021.05.052>.
- 462 [60] Mwanyika GO, Mboera LEG, Rugarabamu S, Makange M, Sindato C, Lutwama  
463 JJ, et al. Circulation of dengue serotype 1 viruses during the 2019 outbreak in  
464 Dar es Salaam, Tanzania. *Pathog Glob Health* 2021;115:467–75.  
465 <https://doi.org/10.1080/20477724.2021.1905302>.
- 466 [61] World Health Organization (WHO). Weekly bulletins on outbreaks and other  
467 emergencies. In: WHO | Regional Office for Africa,  
468 <https://iris.who.int/bitstream/handle/10665/326403/OEW21-2026052019.pdf>; 2019  
469 [accessed 29 November 2023].
- 470 [62] Tchuandom SB, Lissom A, Ateba GHM, Tchouangueu TF, Tchakounte C, Ayuk  
471 AR, et al. Dengue virus serological markers among potential blood donors: an  
472 evidence of asymptomatic dengue virus transmission in Cameroon. *Pan Afr Med*  
473 *J* 2020;36. doi: 10.11604/pamj.2020.36.185.22128.
- 474 [63] World Health Organization (WHO). Weekly bulletins on outbreaks and other  
475 emergencies. In: WHO | Regional Office for Africa,  
476 <https://iris.who.int/bitstream/handle/10665/332246/OEW22-2531052020.pdf>; 2020  
477 [accessed 30 November 2023].
- 478 [64] World Health Organization (WHO). Weekly bulletins on outbreaks and other  
479 emergencies: Week 22, <https://iris.who.int/bitstream/handle/10665/332246/OEW22-2531052020.pdf>; 2020 [accessed 29 November 2023].
- 480
- 481 [65] World Health Organization (WHO) | Regional Office for Africa. Weekly bulletins  
482 on outbreaks and other emergencies: Week 26 | In: WHO | Regional Office for

*Travel Medicine and Infectious Diseases*

- 483 Africa, <https://iris.who.int/bitstream/handle/10665/344522/OEW26-2127062021.pdf>;  
484 2020 [accessed 30 November 2023].
- 485 [66] Simo Tchétgna H, Sado Yousseu F, Kamgang B, Tedjou A, McCall PJ, Wondji  
486 CS. Concurrent circulation of dengue serotype 1, 2 and 3 among acute febrile  
487 patients in Cameroon. *PLoS Negl Trop Dis* 2021;15:e0009860.  
488 <https://doi.org/10.1371/journal.pntd.0009860>.
- 489 [67] Tizhe DT, Kwaga JKP, Nok Kia GS. Serological and Molecular Survey for  
490 Dengue Virus Infection in Suspected Febrile Patients in Selected Local  
491 Government Areas in Adamawa State, Nigeria. *Vaccines* 2022;10:1407.  
492 <https://doi.org/10.3390/vaccines10091407>.
- 493 [68] World Health Organization (WHO). Weekly bulletins on outbreaks and other  
494 emergencies. In: WHO | Regional Office for Africa,  
495 <https://iris.who.int/bitstream/handle/10665/350967/OEW01-271202012022.pdf>; 2022  
496 [accessed 30 November 2023].
- 497 [69] World Health Organization (WHO). Weekly bulletins on outbreaks and other  
498 emergencies. In: WHO | Regional Office for Africa,  
499 <https://iris.who.int/bitstream/handle/10665/342386/OEW27-280604072021.pdf>; 2021  
500 [accessed 30 November 2023].
- 501 [70] World Health Organization (WHO). Weekly bulletins on outbreaks and other  
502 emergencies. In: WHO | Regional Office for Africa,  
503 <https://iris.who.int/bitstream/handle/10665/343406/OEW31-260701082021.pdf>; 2021  
504 [accessed 30 November 2023].
- 505 [71] World Health Organization (WHO). Weekly bulletins on outbreaks and other  
506 emergencies. In: WHO | Regional Office for Africa,  
507 <https://iris.who.int/bitstream/handle/10665/342123/OEW18-2602052021.pdf>; 2021  
508 [accessed 30 November 2023].
- 509 [72] Weekly bulletins on outbreaks and other emergencies. In: WHO | Regional  
510 Office for Africa, [https://iris.who.int/bitstream/handle/10665/356076/OEW14-  
511 280303042022.pdf](https://iris.who.int/bitstream/handle/10665/356076/OEW14-280303042022.pdf); 2022 [accessed 30 November 2023].
- 512 [73] World Health Organization (WHO). Weekly bulletins on outbreaks and other  
513 emergencies. In: WHO | Regional Office for Africa,  
514 <https://iris.who.int/bitstream/handle/10665/355799/OEW23-300505062022.pdf>; 2022  
515 [accessed 30 November 2023].
- 516 [74] World Health Organization (WHO). Weekly bulletins on outbreaks and other  
517 emergencies. In: WHO | Regional Office for Africa,  
518 <https://iris.who.int/bitstream/handle/10665/365480/OEW52-1925120222.pdf>; 2022  
519 [accessed 30 November 2023].
- 520 [75] World Health Organization (WHO) | Regional Office for Africa. Weekly bulletins  
521 on outbreaks and other emergencies. In: WHO | Regional Office for Africa. Niger,  
522 <https://iris.who.int/bitstream/handle/10665/364200/OEW36-290804092022.pdf>; 2022 [  
523 accessed 30 November 2023].
- 524 [76] Africa Centres for Disease Control and Prevention. Weekly Event-Based  
525 Surveillance Report. Africa Centres for Disease Control and Prevention (CDC),  
526 [https://africacdc.org/download/africa-cdc-weekly-event-based-surveillance-report-  
527 december-2023/](https://africacdc.org/download/africa-cdc-weekly-event-based-surveillance-report-december-2023/); 2023 [accessed 30 November 2023].
- 528 [77] World Health Organization (WHO). Dengue Situation Report 001. Côte d'Ivoire:  
529 World Health Organization,

## Travel Medicine and Infectious Diseases

- 530 [https://iris.who.int/bitstream/handle/10665/375392/AFRO.Dengue.Sitrep001-](https://iris.who.int/bitstream/handle/10665/375392/AFRO.Dengue.Sitrep001-20231219.pdf)  
531 [20231219.pdf](https://iris.who.int/bitstream/handle/10665/375392/AFRO.Dengue.Sitrep001-20231219.pdf); 2023 [accessed 30 November 2023].
- 532 [78] World Health Organization (WHO). AFRO Dengue Situation Report 001. World  
533 Health Organization,  
534 [https://iris.who.int/bitstream/handle/10665/375392/AFRO.Dengue.Sitrep001-](https://iris.who.int/bitstream/handle/10665/375392/AFRO.Dengue.Sitrep001-20231219.pdf)  
535 [20231219.pdf](https://iris.who.int/bitstream/handle/10665/375392/AFRO.Dengue.Sitrep001-20231219.pdf); 2023 [accessed 22 January 2024].
- 536 [79] Africa Centres for Disease Control and Prevention (CDC). Weekly Event-Based  
537 Surveillance Report. Africa Centres for Disease Control and Prevention,  
538 [https://iris.who.int/bitstream/handle/10665/375392/AFRO.Dengue.Sitrep001-](https://iris.who.int/bitstream/handle/10665/375392/AFRO.Dengue.Sitrep001-20231219.pdf)  
539 [20231219.pdf](https://iris.who.int/bitstream/handle/10665/375392/AFRO.Dengue.Sitrep001-20231219.pdf); 2023 [accessed 22 January 2024].
- 540 [80] Gomgnimbou MK, Belem LRW, Some K, Diallo M, Barro B, Kaboré A, et al.  
541 Utilization of novel molecular multiplex methods for the detection and,  
542 epidemiological surveillance of dengue virus serotypes and chikungunya virus in  
543 Burkina Faso, West Africa. *Mol Biol Rep* 2024;51:906.  
544 <https://doi.org/10.1007/s11033-024-09847-1>.
- 545 [81] Ahmed A, Eldigail M, Elduma A, Breima T, Dietrich I, Ali Y, et al. First report of  
546 epidemic dengue fever and malaria co-infections among internally displaced  
547 persons in humanitarian camps of North Darfur, Sudan. *Int J Infect Dis IJID Off*  
548 *Publ Int Soc Infect Dis* 2021;108:513–6. <https://doi.org/10.1016/j.ijid.2021.05.052>.
- 549 [82] World Health Organization (WHO). Disease Outbreak News; Dengue – Global  
550 situation. World Health Organization, [https://www.who.int/emergencies/disease-](https://www.who.int/emergencies/disease-outbreak-news/item/2023-DON498#:~:text=Between%201%20January%202023%20and,of%20the%20Americas%2C%20with%2015;)  
551 [outbreak-news/item/2023-](https://www.who.int/emergencies/disease-outbreak-news/item/2023-DON498#:~:text=Between%201%20January%202023%20and,of%20the%20Americas%2C%20with%2015;)  
552 [DON498#:~:text=Between%201%20January%202023%20and,of%20the%20Americas%2C%20with%2015](https://www.who.int/emergencies/disease-outbreak-news/item/2023-DON498#:~:text=Between%201%20January%202023%20and,of%20the%20Americas%2C%20with%2015;);  
553 2023 [accessed 05 January 2024].
- 554 [83] World Health Organization (WHO). Weekly bulletins on outbreaks and other  
555 emergencies. World Health Organization,  
556 [https://iris.who.int/bitstream/handle/10665/375392/AFRO.Dengue.Sitrep001-](https://iris.who.int/bitstream/handle/10665/375392/AFRO.Dengue.Sitrep001-20231219.pdf)  
557 [20231219.pdf](https://iris.who.int/bitstream/handle/10665/375392/AFRO.Dengue.Sitrep001-20231219.pdf); 2023 [accessed 05 January 2024].
- 558 [84] Aliaga-Samanez A, Romero D, Murray K, Segura M, Real R, Olivero J. Potential  
559 climate change effects on the distribution of urban and sylvatic dengue and  
560 yellow fever vectors. *Pathog Glob Health* 2024;118:397–407.  
561 <https://doi.org/10.1080/20477724.2024.2369377>.
- 562 [85] Carlson CJ, Albery GF, Merow C, Trisos CH, Zipfel CM, Eskew EA, et al.  
563 Climate change increases cross-species viral transmission risk. *Nature*  
564 2022;607:555–62. doi: 10.1038/s41586-022-04788-w.
- 565 [86] Gyasi P, Bright Yakass M, Quaye O. Analysis of dengue fever disease in West  
566 Africa. *Exp Biol Med* Maywood NJ 2023;248:1850–63.  
567 <https://doi.org/10.1177/15353702231181356>.
- 568 [87] Badolo A, Sombié A, Yaméogo F, Wangrawa DW, Sanon A, Pignatelli PM, et al.  
569 First comprehensive analysis of *Aedes aegypti* bionomics during an arbovirus  
570 outbreak in west Africa: Dengue in Ouagadougou, Burkina Faso, 2016-2017.  
571 *PLoS Negl Trop Dis* 2022;16:e0010059.  
572 <https://doi.org/10.1371/journal.pntd.0010059>.
- 573 [88] Pappoe-Ashong P, Ofosu-Appiah L, Mingle J, Jassoy C. Seroprevalence of  
574 dengue virus infections in Ghana. *East Afr Med J* 2018;95:2132–40.
- 575 [89] Ouédraogo WM, Zanré N, Rose NH, Zahouli JZB, Djogbenou LS, Viana M, et  
576 al. Dengue vector habitats in Ouagadougou, Burkina Faso, 2020: an unintended



*Travel Medicine and Infectious Diseases*

- 577 consequence of the installation of public handwashing stations for COVID-19  
578 prevention. *Lancet Glob Health* 2024;12:e199–200.  
579 [https://doi.org/10.1016/S2214-109X\(23\)00565-X](https://doi.org/10.1016/S2214-109X(23)00565-X).
- 580 [90] Yeh C-Y, Lu B-Z, Liang W-J, Shu Y-C, Chuang K-T, Chen P-L, et al.  
581 Trajectories of hepatic and coagulation dysfunctions related to a rapidly fatal  
582 outcome among hospitalized patients with dengue fever in Tainan, 2015. *PLoS*  
583 *Negl Trop Dis* 2019;13:e0007817. doi: 10.1371/journal.pntd.0007817.
- 584 [91] Waggoner JJ, Gresh L, Vargas MJ, Ballesteros G, Tellez Y, Soda KJ, et al.  
585 Viremia and clinical presentation in Nicaraguan patients infected with Zika virus,  
586 chikungunya virus, and dengue virus. *Clin Infect Dis* 2016:ciw589. [https://doi:](https://doi.org/10.1093/cid/ciw589)  
587 [10.1093/cid/ciw589](https://doi.org/10.1093/cid/ciw589).
- 588 [92] Sierra B, Triska P, Soares P, Garcia G, Perez AB, Aguirre E, et al. OSBPL10,  
589 RXRA and lipid metabolism confer African-ancestry protection against dengue  
590 haemorrhagic fever in admixed Cubans. *PLoS Pathog* 2017;13:e1006220.  
591 <https://doi.org/10.1371/journal.ppat.1006220>.
- 592 [93] Seidahmed OME, Hassan SA, Soghaier MA, Siam HAM, Ahmed FTA,  
593 Elkarsany MM, et al. Spatial and temporal patterns of dengue transmission along  
594 a Red Sea coastline: a longitudinal entomological and serological survey in Port  
595 Sudan city. *PLoS Negl Trop Dis* 2012;6:e1821.  
596 <https://doi.org/10.1371/journal.pntd.0001821>.
- 597 [94] Andayi F, Charrel RN, Kieffer A, Richet H, Pastorino B, Leparc-Goffart I, et al. A  
598 sero-epidemiological study of arboviral fevers in Djibouti, Horn of Africa. *PLoS*  
599 *Negl Trop Dis* 2014;8:e3299. <https://doi.org/10.1371/journal.pntd.0003299>.
- 600 [95] Seidahmed OME, Siam H a. M, Soghaier MA, Abubakr M, Osman HA, Abd  
601 Elrhman LS, et al. Dengue vector control and surveillance during a major  
602 outbreak in a coastal Red Sea area in Sudan. *East Mediterr Health J Rev Sante*  
603 *Mediterr Orient Al-Majallah Al-Sihhiyah Li-Sharq Al-Mutawassit* 2012;18:1217–  
604 24. <https://iris.who.int/handle/10665/118472>.
- 605 [96] Donatien K, Hien YE, Salam S, Yacouba NK, Denise IP, Nikièma AR, et al.  
606 Seroepidemiological Study of Dengue Virus Infection Suspected Cases in  
607 Burkina Faso. *J Biosci Med* 2023;11:47–56. doi: 10.4236/jbm.2023.111006.
- 608 [97] Ouattara CA, Traore S, Sangare I, Traore TI, Meda ZC, Savadogo LGB.  
609 Spatiotemporal analysis of dengue fever in Burkina Faso from 2016 to 2019.  
610 *BMC Public Health* 2022;22:462. <https://doi.org/10.1186/s12889-022-12820-x>.
- 611 [98] Klassou KS, Komi K. Analysis of extreme rainfall in Oti river basin (West Africa).  
612 *J Water Clim Change* 2021;12:1997–2009. <https://doi.org/10.2166/wcc.2021.154>.
- 613 [99] Fotso-Nguemo TC, Diallo I, Diakhaté M, Vondou DA, Mbaye ML, Haensler A, et  
614 al. Projected changes in the seasonal cycle of extreme rainfall events from  
615 CORDEX simulations over Central Africa. *Clim Change* 2019;155:339–57.  
616 <https://doi.org/10.1007/s10584-019-02492-9>.
- 617 [100] Mwangi E, MacLeod D, Kniveton D, Todd MC. Variability of rainy season  
618 onsets over East Africa. *Int J Climatol* 2024;44:3357–79.  
619 <https://doi.org/10.1002/joc.8528>.
- 620 [101] Sintayehu DW, Tassie N, De Boer WF. Present and future climatic suitability  
621 for dengue fever in Africa. *Infect Ecol Epidemiol* 2020;10:1782042.  
622 <https://doi.org/10.1080/20008686.2020.1782042>.
- 623
