# Supplementary material for: A decade of dengue disease burden in Africa (2013–2023): a systematic review
Source: bioRxiv or medRxiv preprint supplement (doi:10.1101/2024.10.22.24315827), 2024-10-27
Supplement: Supplementary file [file media-1.pdf]

## Supplementary materials

Mwanyika, Gaspar (2024), "S1. Advanced search strategy for PubMed/Medline databases", Mendeley Data, V1, <https://data.mendeley.com/datasets/zf7x7wy7xg/1>

Mwanyika, Gaspar (2024), "S2. Excluded articles for specific reasons.", Mendeley Data, V1, <https://data.mendeley.com/datasets/3qjypt9yvs/1>

Mwanyika, Gaspar (2024), "S3. PRISMA 2020 checklist", Mendeley Data, V1, <https://data.mendeley.com/datasets/hx4r4jywmb/1>

Mwanyika, Gaspar (2024), "S4. R programming codes ", Mendeley Data, V1, <https://data.mendeley.com/datasets/d9kyhgsx2m/1>

Mwanyika, Gaspar (2024), "S5. Transmission potential (Index P) data", Mendeley Data, V1, <https://data.mendeley.com/datasets/cv9c4gzdy9/1>
